# Supplementary material for: AvaFrame com1DFA (v1.3): a thickness-integrated computational avalanche module – theory, numerics, and testing
Source: Copernicus journal article supplement (doi:10.5194/gmd-16-7013-2023), 2023-11-30
Supplement: Supplementary file 1 [file gmd-16-7013-2023-supplement.zip]

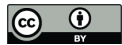

## *Supplement of*

# **AvaFrame *comIDFA* (v1.3): a thickness-integrated computational avalanche module – theory, numerics, and testing**

**Matthias Tonnel et al.**

*Correspondence to:* Felix Oesterle (felix@avaframe.org)

- gmd-16-7013-2023-supplement-title-page.pdf
- supplementary
  - 31ebc07131\_SimiSolTest.png
  - 86b243f4c1\_DamBreakTest.png
  - Readme.txt
  - rotationTest\_avaTripleBowl\_Pressure
    - \* avaTripleBowl\_pft\_0p5\_rel120\_a5f2c6502b\_null\_dfa\_ContourComparisonToReference.png
    - \* avaTripleBowl\_pft\_0p5\_rel225\_ca2950427f\_null\_dfa\_ContourComparisonToReference.png
    - \* avaTripleBowl\_pft\_0p5\_slComparisonStat.png
    - \* rel0\_c800e83e4d\_null\_dfa\_EnergyTest.png
    - \* rel120\_a5f2c6502b\_null\_dfa\_EnergyTest.png
    - \* rel225\_ca2950427f\_null\_dfa\_EnergyTest.png
    - \* rotationTestReport.md
  - rotationTest\_avaTripleBowl\_analytic
    - \* avaTripleBowl\_pft\_0p5\_rel120\_af206348bf\_null\_dfa\_ContourComparisonToReference.png
    - \* avaTripleBowl\_pft\_0p5\_rel225\_65cb22beb7\_null\_dfa\_ContourComparisonToReference.png
    - \* avaTripleBowl\_pft\_0p5\_slComparisonStat.png
    - \* rel0\_c04bcbd1e4\_null\_dfa\_EnergyTest.png
    - \* rel120\_af206348bf\_null\_dfa\_EnergyTest.png
    - \* rel225\_65cb22beb7\_null\_dfa\_EnergyTest.png
    - \* rotationTestReport.md
  - rotationTest\_avaTripleParabola\_Pressure
    - \* avaTripleParabola\_pft\_0p5\_rel120\_02a7ef6912\_null\_dfa\_ContourComparisonToReference.png
    - \* avaTripleParabola\_pft\_0p5\_rel225\_d289d2838a\_null\_dfa\_ContourComparisonToReference.png
    - \* avaTripleParabola\_pft\_0p5\_slComparisonStat.png
    - \* rel0\_9501be6c38\_null\_dfa\_EnergyTest.png
    - \* rel120\_02a7ef6912\_null\_dfa\_EnergyTest.png

- \* rel225\_d289d2838a\_null\_dfa\_EnergyTest.png
- \* rotationTestReport.md
- rotationTest\_avaTripleParabola\_analytic
  - \* avaTripleParabola\_pft\_0p5\_rel120\_ba224d3392\_null\_dfa\_ContourComparisonToReference.png
  - \* avaTripleParabola\_pft\_0p5\_rel225\_4f6929ad36\_null\_dfa\_ContourComparisonToReference.png
  - \* avaTripleParabola\_pft\_0p5\_slComparisonStat.png
  - \* rel0\_89d7ff4e9a\_null\_dfa\_EnergyTest.png
  - \* rel120\_ba224d3392\_null\_dfa\_EnergyTest.png
  - \* rel225\_4f6929ad36\_null\_dfa\_EnergyTest.png
  - \* rotationTestReport.md
- supplementary.md

The copyright of individual parts of the supplement might differ from the article licence.
